# Supplementary material for: Diffusiophoresis of a Nonionic Micelle in Salt Gradients; Roles of Preferential Hydration and Salt-Induced Surfactant Aggregation
Source: MDPI journal article supplement (doi:10.3390/ijms232213710), 2022-11-08
Supplement: s1 [file s1]

## Supplementary Data

### Diffusiophoresis of a Nonionic Micelle in Salt Gradients: Roles of Preferential Hydration and Salt-Induced Surfactant Aggregation

Eliandreina Cruz Barrios, Kyra V. Penino and Onofrio Annunziata

#### S1. Thermodynamic and Transport Data

Our DLS diffusion coefficients (in the volume-fixed reference frame) are reported in Table S1.

**Table S1.** DLS diffusion coefficients of tyloxapol in aqueous MgSO<sub>4</sub> at 25 °C.

|               |                                         |               |                                         |               |                                         |
|---------------|-----------------------------------------|---------------|-----------------------------------------|---------------|-----------------------------------------|
| $C_2 = 0M$    |                                         | $C_2 = 0.10M$ |                                         | $C_2 = 0.20M$ |                                         |
| $C_1/mM$      | $\mathcal{D}/10^{-12} m^2 \cdot s^{-1}$ | $C_1/mM$      | $\mathcal{D}/10^{-12} m^2 \cdot s^{-1}$ | $C_1/mM$      | $\mathcal{D}/10^{-12} m^2 \cdot s^{-1}$ |
| 0.20          | 67.1±0.09                               | 0.20          | 66.6±0.06                               | 0.20          | 62.9±0.05                               |
| 0.40          | 67.3±0.04                               | 0.40          | 65.7±0.02                               | 0.40          | 61.0±0.08                               |
| 0.70          | 67.8±0.03                               | 0.70          | 64.9±0.05                               | 0.70          | 59.2±0.07                               |
| 1.00          | 68.2±0.02                               | 1.00          | 63.9±0.03                               | 1.00          | 58.0±0.02                               |
| $C_2 = 0.30M$ |                                         | $C_2 = 0.45M$ |                                         | $C_2 = 0.60M$ |                                         |
| $C_1/mM$      | $\mathcal{D}/10^{-12} m^2 \cdot s^{-1}$ | $C_1/mM$      | $\mathcal{D}/10^{-12} m^2 \cdot s^{-1}$ | $C_1/mM$      | $\mathcal{D}/10^{-12} m^2 \cdot s^{-1}$ |
| 0.20          | 54.5±0.04                               | 0.20          | 40.2±0.03                               | 0.20          | 26.2±0.02                               |
| 0.40          | 52.7±0.01                               | 0.40          | 35.6±0.01                               | 0.40          | 21.9±0.01                               |
| 0.70          | 49.7±0.04                               | 0.70          | 31.7±0.02                               | 0.70          | 18.0±0.01                               |
| 1.00          | 47.4±0.02                               | 1.00          | 26.7±0.01                               |               |                                         |
| $C_2 = 0.65M$ |                                         |               |                                         |               |                                         |
| $C_1/mM$      | $\mathcal{D}/10^{-12} m^2 \cdot s^{-1}$ |               |                                         |               |                                         |
| 0.20          | 21.9±0.02                               |               |                                         |               |                                         |
| 0.40          | 18.1±0.01                               |               |                                         |               |                                         |
| 0.70          | 15.2±0.04                               |               |                                         |               |                                         |
| 1.00          | 11.1±0.01                               |               |                                         |               |                                         |

Thermodynamic and transport coefficients for the binary MgSO<sub>4</sub>-water system at 25 °C are reported in Table S2. Data of salt partial molar volume,  $\bar{V}_2$ , and thermodynamic factors,  $y_2$ , extracted from literature.<sup>1,2</sup> Mutual diffusion coefficients,  $D_{2,V}$ , of the binary salt-water system in the volume-fixed reference frame were measured in this work. Relative deviations of ternary values,  $D_{22}$ , from binary values:  $r = D_{22}/D_{2,V} - 1$  are also included. Finally, relative viscosity coefficients,  $\eta_r$ , were taken from literature.<sup>3</sup>

**Table S2.** Thermodynamic and transport properties of aqueous MgSO<sub>4</sub> at 25 °C.

| $C_2/M$ | $\bar{V}_2/cm^3 \cdot mol^{-1}$ | $y_2$ | $D_{2,V}/10^{-11} m^2 \cdot s^{-1}$ | $r/\%$ | $\eta_r$ |
|---------|---------------------------------|-------|-------------------------------------|--------|----------|
| 0.100   | 1.17                            | 0.538 | 572                                 | -1.5   | 1.072    |
| 0.300   | 4.65                            | 0.498 | 496                                 | -1.5   | 1.221    |
| 0.500   | 7.14                            | 0.500 | 454                                 | -2.6   | 1.399    |
| 0.650   | 8.73                            | 0.518 | 429                                 | -1.6   | 1.568    |

Micelle diffusiophoresis coefficients,  $\widehat{D}_{12}$ , and salt osmotic diffusion coefficients,  $\widehat{D}_{21}$ , are reported in Table S3. This table also reports micelle tracer diffusion coefficients,  $D_p$ , mobility ratios,  $\alpha$ , and thermodynamic parameters,  $C_{21}$  and  $\gamma/m$ . The tracer diffusion coefficient of tyloxapol in the binary aqueous system was found to be  $0.0690 \times 10^{-12} \text{ m}^2 \cdot \text{s}^{-1}$  by Rayleigh interferometry and  $0.0668 \times 10^{-12} \text{ m}^2 \cdot \text{s}^{-1}$  by DLS. Thus, the DLS value is 3.3% lower. This discrepancy can be attributed to tyloxapol polydispersity. To calculate  $\widehat{D}_{12}(C_2)$ , we use the values of  $D_1$  extracted from DLS measurements by linear extrapolation at  $C_1 = 0$  and correct them by the factor of 1.033 to take into account this small discrepancy between interferometric and light scattering data. Value of  $D_1$  at  $C_2 = 0.65 \text{ M}$  is obtained by linear interpolation of values of  $D_1$  at  $C_2 = 0.60 \text{ M}$  and  $0.69 \text{ M}$ .

**Table S3.** Thermodynamic and transport parameters related to micelle diffusiophoresis.

| $C_2/\text{M}$ | $\widehat{D}_{12}$ | $\widehat{D}_{21}$ | $D_1/10^{-12} \text{ m}^2 \cdot \text{s}^{-1}$ | $\alpha$ | $C_{21}$ | $\gamma/m$ |
|----------------|--------------------|--------------------|------------------------------------------------|----------|----------|------------|
| 0.10           | 0.52               | 1.23               | 70.3                                           | 0.1230   | 1.34     | 0.94       |
| 0.30           | 1.72               | 3.23               | 58.5                                           | 0.1177   | 3.47     | 2.28       |
| 0.50           | 4.02               | 5.76               | 45.2                                           | 0.0993   | 6.14     | 4.17       |
| 0.65           | 5.71               | 7.26               | 28.4                                           | 0.0658   | 7.56     | 5.00       |

## S2. Effect of salt on surfactant aggregation. Consequences on diffusiophoresis

In this section, we explain the observed increase in micelle radius observed at high salt concentration. To explain experimental behavior, we assume that surfactant (S) unimers can reversibly make both spherical micelles (M) and larger aggregates (A) with well-defined aggregation numbers. In our model, the observed micelle radius is a weighted average between micelle and aggregate radius. These equilibria can be described by considering the following reversible reactions:

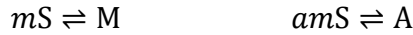

where  $m$  is the micelle aggregation number and  $a$  is the molecular-weight ratio of aggregate to micelle. We use the symbols “1” and “2” to indicate the surfactant and salt components, respectively. The total surfactant concentration is

$$C_1 = C_s + mC_M + a mC_A \tag{S1}$$

where  $C_s$ ,  $C_M$  and  $C_A$  are the concentrations of free surfactant, micelles, and aggregates, respectively. In principle, the fraction of aggregates and micelles become zero in the limit of  $C_1 \rightarrow 0$  as all surfactant should occur as free unimers at infinite dilution. Furthermore, dilution also favors micelles with respect to aggregates because aggregate formation requires a larger number of unimers compared to micelles. However, surfactant concentrations in which disaggregation is favored may be sufficiently low that cannot be accessed experimentally. For instance, tyloxapol critical micelle concentration is sufficiently low that we can neglect  $C_s$  in Eq. S1. Furthermore, extrapolation to  $C_1 \rightarrow 0$  of experimental data will practically yield physicochemical quantities that relate to micelles not free surfactant. A similar argument will be proposed below for aggregates with respect to smaller micelles.

If we neglect free surfactant in Eq. S1, we can write:

$$C_1 \cong mC_M + a mC_A \tag{S2}$$

and the fraction of aggregated surfactant is

$$X_A \equiv \frac{amC_A}{C_1} \cong \frac{amC_A}{mC_M + amC_A} \quad (\text{S3})$$

with  $1-X_A$  being the fraction of micellar surfactant. In our model, the observed behavior of Stokes radius,  $R_p(C_2)$ , is caused by an increase in  $X_A$  with salt concentration. Our goal is to determine a mathematical expression for  $X_A$ .

Micelle-aggregate chemical equilibrium may be described by

$$\frac{C_A}{C_M^a} = \left( \frac{C_1^*}{m} \right)^{1-a} \quad (\text{S4})$$

where  $(C_1^*/m)^{1-a}$  is the equilibrium constant, rewritten so that  $C_1^*$  is a critical surfactant concentration above which aggregates become favored with respect to micelles. We can then rewrite Eq. S4 using the fraction of aggregated surfactant given by Eq. S3:

$$\frac{X_A}{1-X_A} = a \left( \frac{mC_M}{C_1^*} \right)^{a-1} \quad (\text{S5})$$

To introduce the effect of salt concentration on micelle-aggregate chemical equilibrium, we assume that  $C_1^*$  depends on salt concentration,  $C_2$ . Since salt promotes formation of aggregates at high salt concentration,  $C_1^*$  must decrease as salt concentration increases. This salting-out effect can be described by assuming that  $\ln C_1^*$  linearly decreases as  $C_2$  increases according to:

$$\ln C_1^* = \ln C_1^{0*} - K_2' C_2 \quad (\text{S6})$$

where  $C_1^{0*}$  is the value of  $C_1^*$  in the absence of salt and the coefficient,  $K_2'$ , is a salting-out constant. The physical meaning of  $K_2'$  can be explained using the preferential-hydration model. Within model framework,  $K_2'$  is directly proportional to  $N_W^{(M)} - N_W^{(A)}$ , where  $N_W^{(M)}$  and  $N_W^{(A)}$  are water excesses per surfactant unit in the micellar and aggregate state, respectively. The positive parameters,  $N_W^{(M)}$  and  $N_W^{(A)}$ , characterize how surfactant chemical potential in micelle and aggregate states increases with salt concentration. If the surfactant chemical potential in the micelle state increases more rapidly than that in the aggregate state ( $N_W^{(M)} > N_W^{(A)}$ ) then  $K_2' > 0$ . This implies that there exists a salt concentration above which aggregates become more stable than micelles.

Based on Eq. S6, the ratio,  $mC_M/C_1^*$  in Eq. S5, can be rewritten in the following way:

$$\frac{mC_M}{C_1^*} = \frac{mC_M}{C_1} \frac{C_1}{C_1^*} = (1-X_A) \frac{C_1}{C_1^{0*}} e^{K_2' C_2} \quad (\text{S7})$$

To ensure that  $mC_M/C_1^*$  and  $X_A$  in Eqs. S6,7 do not vanish in the limit of  $C_1 \rightarrow 0$ , we should interpret  $C_1^{0*}$  as infinitely small. From experimental point of view, this corresponds to  $C_1^{0*}$  being low compared to experimental surfactant concentrations. Thus, the factor  $(C_1/C_1^{0*}) e^{K_2' C_2}$  in Eq. S7 will also not vanish in the limit of  $C_1 \rightarrow 0$ . We expect that  $C_1/C_1^{0*}$  is a small fraction of 1 as aggregates are negligible compared to micelles in water. However, as salt concentration increases, the factor  $(C_1/C_1^{0*}) e^{K_2' C_2}$  increases thereby making the fraction of aggregates no longer negligible. It is convenient to introduce a salt concentration  $C_2^*$  such that  $(C_1/C_1^{0*}) e^{K_2' C_2^*} = 1$ . We can then rewrite Eq. S7 in the following way:

$$\frac{mC_M}{C_1^*} = (1 - X_A) e^{K_2'(C_2 - C_2^*)} \quad (\text{S8})$$

This expression of  $mC_M / C_1^*$  can be then inserted into Eq. S5 to finally obtain:

$$X_A = a (1 - X_A)^a e^{K_2(C_2 - C_2^*)} \quad (\text{S9})$$

which is the same as Eq. 11 in the manuscript with  $K_2 \equiv (a-1)K_2'$ . If the parameters  $a$ ,  $K_2$  and  $C_2^*$  are known, Eq. S9 can be numerically solved for  $X_A$  using Newtown's method starting from the seed value of  $X_A = 0$ .

We now turn our attention to the normalized Stokes' radius,  $R_p(C_2) / R_p(0)$ , and reduced diffusiophoresis coefficient,  $\hat{D}_{12}(C_2)$ , and their relation with  $X_A$ . To describe the effect of aggregation on surfactant diffusion, we assume simple Fick's first law for micelle and aggregate:

$$J_M = -D_M \nabla C_M \quad (\text{S10})$$

$$J_A = -D_A \nabla C_A \quad (\text{S11})$$

where  $J_M$  and  $J_A$  are micelle and aggregate fluxes, and  $D_M$  and  $D_A$  the corresponding diffusion coefficients. According to mass balance (see Eq. S2), the total surfactant flux is given by

$$\frac{J_1}{m} = J_M + a J_A = -D_M \nabla C_M - a D_A \nabla C_A \quad (\text{S12})$$

Assuming rapid equilibrium, the concentration gradients  $\nabla C_M$  and  $\nabla C_A$  can be related to  $\nabla C_1$  and  $\nabla C_2$  by

$$\nabla C_M = \left( \frac{\partial C_M}{\partial C_1} \right)_{C_2} \nabla C_1 + \left( \frac{\partial C_M}{\partial C_2} \right)_{C_1} \nabla C_2 \quad (\text{S13})$$

$$\nabla C_A = \left( \frac{\partial C_A}{\partial C_1} \right)_{C_2} \nabla C_1 + \left( \frac{\partial C_A}{\partial C_2} \right)_{C_1} \nabla C_2 \quad (\text{S14})$$

Accordingly, Eq. S12 becomes:

$$J_1 = -D_{11} \nabla C_1 - D_{12} \nabla C_2 \quad (\text{S15})$$

where

$$D_{11} = m \left( \frac{\partial C_M}{\partial C_1} \right)_{C_2} D_M + ma \left( \frac{\partial C_A}{\partial C_1} \right)_{C_2} D_A \quad (\text{S16})$$

$$D_{12} = m \left( \frac{\partial C_M}{\partial C_2} \right)_{C_1} D_M + ma \left( \frac{\partial C_A}{\partial C_2} \right)_{C_1} D_A \quad (\text{S17})$$

The four partial derivatives appearing in Eqs. S16,17 can be expressed as functions of  $X_A$ . Since  $aC_A = (C_1 / m) X_A$  and  $C_M = (C_1 / m)(1 - X_A)$ , we can first write:

$$m \left( \frac{\partial C_M}{\partial C_1} \right)_{C_2} = (1 - X_A) - C_1 \left( \frac{\partial X_A}{\partial C_1} \right)_{C_2} \quad (\text{S18})$$

$$ma \left( \frac{\partial C_A}{\partial C_1} \right)_{C_2} = X_A + C_1 \left( \frac{\partial X_A}{\partial C_1} \right)_{C_2} \quad (\text{S19})$$

$$m \left( \frac{\partial C_M}{\partial C_2} \right)_{C_1} = -C_1 \left( \frac{\partial X_A}{\partial C_2} \right)_{C_1} \quad (\text{S20})$$

$$ma \left( \frac{\partial C_A}{\partial C_2} \right)_{C_1} = C_1 \left( \frac{\partial X_A}{\partial C_2} \right)_{C_1} \quad (\text{S21})$$

We can then deduce the expressions of  $(\partial X_A / \partial C_1)_{C_2}$  and  $(\partial X_A / \partial C_2)_{C_1}$  from Eq. S9 reported below:

$$\left( \frac{\partial X_A}{\partial C_1} \right)_{C_2} = -\frac{a X_A}{1 - X_A} \left( \frac{\partial X_A}{\partial C_1} \right)_{C_2} - K_2 X_A \frac{dC_2^*}{dC_1} \quad (\text{S22})$$

$$\left( \frac{\partial X_A}{\partial C_2} \right)_{C_1} = -\frac{a X_A}{1 - X_A} \left( \frac{\partial X_A}{\partial C_2} \right)_{C_1} + K_2 X_A \quad (\text{S23})$$

To determine  $dC_2^* / dC_1$  in Eq. S22, we observe that  $C_2^*$  is defined such that  $K_2' C_2^* = -\ln(C_1 / C_1^{0*})$ . This implies that  $K_2 (dC_2^* / dC_1) = -(a-1)(1/C_1)$ . Thus, the final expressions of  $(\partial X_A / \partial C_1)_{C_2}$  and  $(\partial X_A / \partial C_2)_{C_1}$  are

$$\left( \frac{\partial X_A}{\partial C_1} \right)_{C_2} = \frac{1}{C_1} \frac{(a-1)(1-X_A)X_A}{1+(a-1)X_A} \quad (\text{S24})$$

$$\left( \frac{\partial X_A}{\partial C_2} \right)_{C_1} = K_2 \frac{(1-X_A)X_A}{1+(a-1)X_A} \quad (\text{S25})$$

Substitution of Eqs. S24,25 into Eqs. S18-21 allows us to rewrite Eqs. S16,17 in the following way:

$$D_{11} = \frac{(1-X_A)D_M + aX_A D_A}{(1-X_A) + aX_A} \quad (\text{S28})$$

$$D_{12} = -C_1 \frac{K_2 v_2 (1-X_A)X_A}{(1-X_A) + aX_A} (D_M - D_A) \quad (\text{S29})$$

In Eq. S28, we obtain  $D_{11} \cong D_M$  if  $X_A \ll 1$  as expected. This condition is approximately achieved in the absence of salt ( $C_2 = 0$ ). Since the observed Stokes radius,  $R_p(C_2)$ , is inversely proportional to  $D_{11}$ , we finally obtain Eq. 11 in the manuscript:

$$\frac{R_p}{R_p^0} = \frac{1 - X_A + a X_A}{1 - X_A + a X_A \alpha_a} \quad (\text{S30})$$

where  $R_p^0 \equiv R_p(0)$  and  $\alpha_a \equiv D_A / D_M$  is a mobility ratio. According to Eq. S30,  $R_p$  increases with  $X_A$  when  $\alpha_a < 1$ . It is interesting to observe that the same expression of  $R_p$  can be obtained in dynamic light

scattering by assuming that micelles and aggregates are not in chemical equilibrium. Indeed,  $a X_A$  represents the light-scattering weight of the aggregates.

To obtain the expression of the reduced diffusiophoresis coefficient,  $\hat{D}_{12}$ , we combine Eq. S29 with Eq. S28 as shown below:

$$\hat{D}_{12} = \frac{D_{12}C_2}{v_2 D_{11}C_1} = -\frac{(1-X_A)X_A}{1-X_A+aX_A\alpha_a} \frac{(1-\alpha_a)K_2C_2}{v_2} \quad (\text{S31})$$

which is Eq. 13 in the manuscript.

To calculate  $\hat{D}_{12}(C_2)$ , we need to know the values of  $a$ ,  $\alpha_a$ ,  $K_2$  and  $X_A$ , with  $X_A$  obtained from  $a$ ,  $K_2$  and  $C_2^*$  using Eq. S9. To reduce number of parameters, we set the value of  $a$  equal to three representative values:  $a = 10, 20$  and  $100$  and calculate  $\alpha_a$  from  $a$  by assuming that micelles are spheres and aggregates are prolate ellipsoids with minor semiaxis equal to micelle radius,  $R_M$ , and major semiaxis,  $R_A > R_M$ . The diffusion-coefficient ratio can then be written as

$$\alpha_a = \frac{D_A}{D_M} = \frac{R_M}{(R_A R_M^2)^{1/3}} \varphi \quad (\text{S32})$$

where  $\varphi$  is the Perrin shape factor.<sup>4,5</sup> For a prolate ellipsoid, we can write:

$$\varphi = \frac{(R_M/R_A)^{2/3}}{\sqrt{1-(R_M/R_A)^2}} \ln \frac{1+\sqrt{1-(R_M/R_A)^2}}{(R_M/R_A)} \quad (\text{S33})$$

Assuming micelle and aggregate share the same density, the ratio of aggregate-to-micelle volume  $R_A R_M^2 / R_M^3 = R_A / R_M$  is equal to the ratio of aggregate-to-micelle aggregation numbers,  $a$ . This leads to

$$\alpha_a = \frac{\ln(a + \sqrt{a^2 - 1})}{\sqrt{a^2 - 1}} \quad (\text{S34})$$

Thus, for a given value of  $a$ ,  $\alpha_a$  is directly obtained using Eq. S34. We then use experimental data of  $R_p(C_2)$  to extract  $K_2$  and  $C_2^*$ . Specifically, we combine Eqs. S9,S30 to write:

$$\frac{R_p}{R_p^0} = \frac{1+a(a-1)e^{K_2(C_2-C_2^*)}(1-X_A)^a}{1+a(a\alpha_a-1)e^{K_2(C_2-C_2^*)}(1-X_A)^a} \quad (\text{S35})$$

According to Eq. S35,  $R_p / R_p^0$  depends on two variables,  $C_2$  and  $X_A$ , while  $K_2$  and  $C_2^*$  being the two parameters to be determined. However, the set of values of  $X_A$  to be used on the right side of Eq. S9 is initially unknown as they depend on  $K_2$  and  $C_2^*$ . We therefore choose two approximate values of  $K_2$  and  $C_2^*$  and calculate  $X_A$  at each experimental  $C_2$  from Eq. S9. Specifically, we numerically solve Eq. S9 using Newton's method starting with  $X_A^{(0)} = 0$ :

$$X_A^{(i)} = X_A^{(i-1)} - \frac{X_A^{(i-1)} - a(1-X_A^{(i-1)})^a e^{K_2(C_2-C_2^*)}}{1+a^2(1-X_A^{(i-1)})^{a-1} e^{K_2(C_2-C_2^*)}} \quad \text{with } i=1,2,3,\dots \quad (\text{S36})$$

The method of least squares based on Eq. S35 is then applied to  $R_p(C_2, X_A)$  data and new values of  $K_2$  and  $C_2^*$  are extracted. These are then used to recalculate the set of values of  $X_A$  using Eq. S36. This procedure is repeated until values of  $K_2$  and  $C_2^*$  remain the same within their statistical uncertainties. Our results are reported in Table S6 below.

**Table S6.** Parameters extracted by applying the method least squares based on Eq. S35.

| $a$ | $\alpha_a$ | Na <sub>2</sub> SO <sub>4</sub> | $K_2/M^{-1}$ | $C_2^*/M$ | MgSO <sub>4</sub> | $K_2/M^{-1}$ | $C_2^*/M$ |
|-----|------------|---------------------------------|--------------|-----------|-------------------|--------------|-----------|
| 10  | 0.3008     |                                 | 19±3         | 0.72±0.02 |                   | 16±3         | 0.89±0.03 |
| 20  | 0.1846     |                                 | 15±2         | 0.91±0.03 |                   | 13±3         | 1.08±0.08 |
| 100 | 0.0530     |                                 | 12±2         | 1.3±0.1   |                   | 11±3         | 1.5±0.2   |

## References

- (1) Rard, J. A.; Miller, D. G. mutual diffusion-coefficients of Na<sub>2</sub>SO<sub>4</sub>-h<sub>2</sub>o and MgSO<sub>4</sub>-h<sub>2</sub>o at 25-degrees-c from rayleigh interferometry. *Journal of Solution Chemistry* **1979**, *8* (10), 755-766. DOI: 10.1007/bf00648779.
- (2) Rard, J. A.; Miller, D. G. Isopiestic determination of the osmotic coefficients of aqueous Na<sub>2</sub>SO<sub>4</sub>, MgSO<sub>4</sub>, and Na<sub>2</sub>SO<sub>4</sub>-MgSO<sub>4</sub> at 25 C. *J. Chem. Eng. Data* **1981**, *26* (1), 33-38. DOI: 10.1021/jc00023a013.
- (3) Korosi, A.; Fabuss, B. M. Viscosities of binary aqueous solutions of sodium chloride, potassium chloride, sodium sulfate, and magnesium sulfate at concentrations and temperatures of interest in desalination processes. *Journal of Chemical & Engineering Data* **2002**, *13* (4), 548-552. DOI: 10.1021/jc60039a031.
- (4) Neurath, H. The Apparent Shape of Protein Molecules. *J. Am. Chem. Soc.* **2002**, *61* (7), 1841-1844. DOI: 10.1021/ja01876a060.
- (5) Perrin, F. Mouvement Brownien d'un ellipsoide (II). Rotation libre et dépolariation des fluorescences. Translation et diffusion de molécules ellipsoidales. *J. Phys. Radium* **1936**, *7* (1), 1-11, 10.1051/jphysrad:01936007010100.
